# Supplementary material for: In vitro crystallization of single crystalline guanine microplates mediated by proteins extracted from carp fish Cyprinus carpio
Source: Royal Society of Chemistry journal article supplement (doi:10.1039/d4ce00228h), 2024-01-01
Supplement: d4ce00228h2.pdf [file d4ce00228h2.pdf]

## Electronic supplementary information

### *In vitro* crystallization of single crystalline guanine microplates mediated by proteins extracted from the carp fish *Cyprinus carpio*

Yujing Ren<sup>a</sup>, Xiubin Hou<sup>a</sup>, Ying Zhang<sup>a</sup>, JingYan Hao<sup>a</sup>, Juan Gao<sup>a</sup>, Xinbing Song,  
Yurong Ma,<sup>\*a</sup>

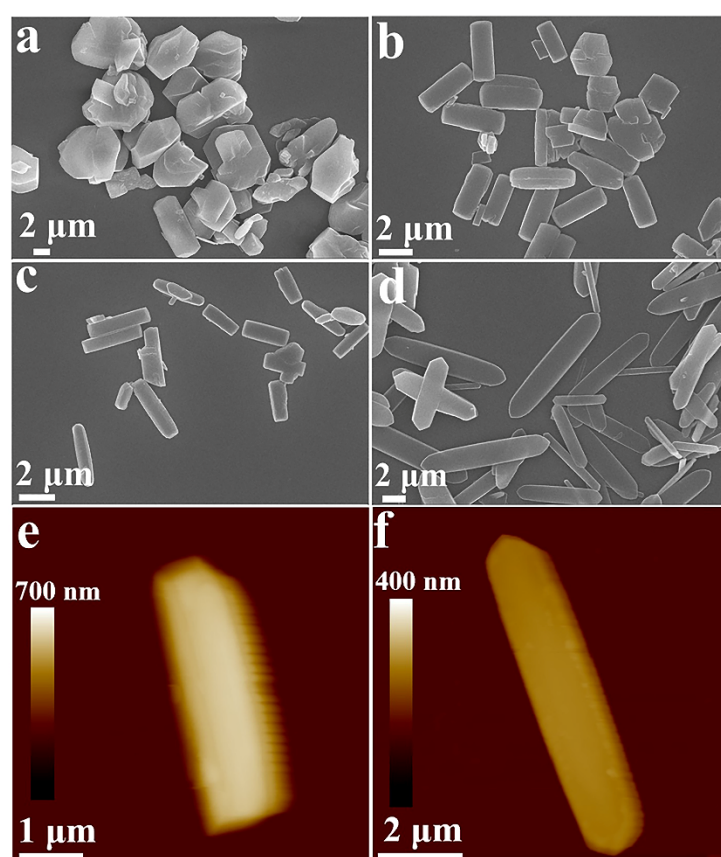

Fig. S1 SEM and AFM images of guanine crystals synthesized with different concentrations of mixed proteins under otherwise standard condition. (a) 0 μg·mL<sup>-1</sup>, (b) 10 μg·mL<sup>-1</sup>, (c and e) 30 μg·mL<sup>-1</sup>, (d and f) 100 μg·mL<sup>-1</sup>.

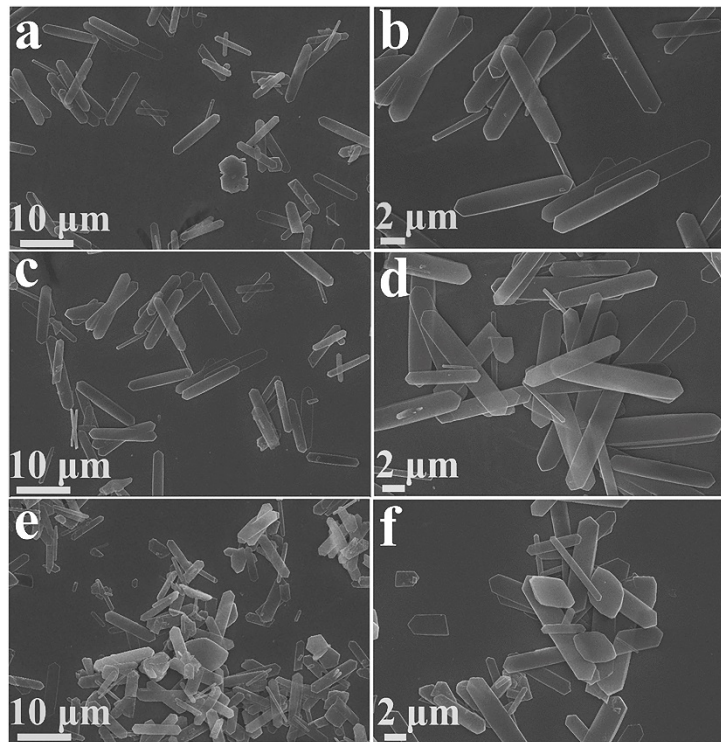

Fig. S2 SEM images of guanine crystals synthesized with different concentrations of G-Na under otherwise standard condition. (a and b) 2 mM, (c and d) 7.5 mM, (e and f) 10 mM.

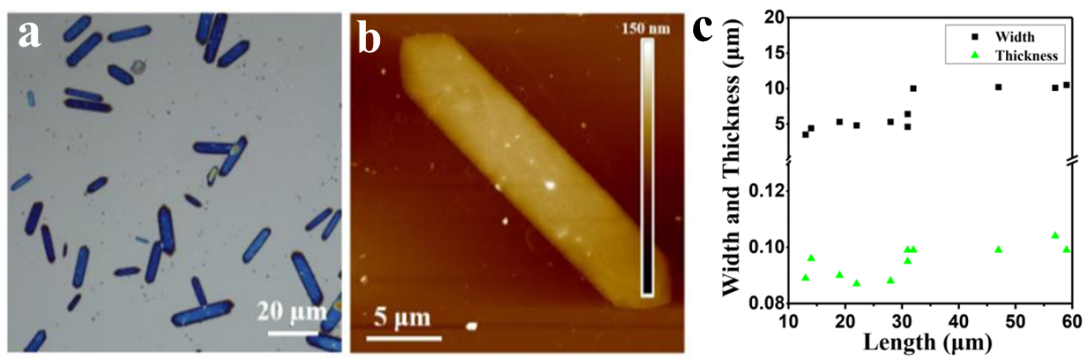

Fig. S3 Biological guanine microplates (a) Optical and (b and c) AFM images of the guanine extracted from the carp fish *Cyprinus carpio*, data from reference <sup>37</sup>.
